# Supplementary material for: The role of emotional similarity and emotional accuracy in belonging and stress among first-generation and continuing-generation students
Source: Frontiers journal article supplement (doi:10.3389/fpsyg.2024.1355526), 2024-02-14

## Supplementary Materials

Table S1

*Moderation Analysis: Differences in the Paths of the Model Between the Two Groups*

| Path in the model                        | Sample           |       |                       |       | z-score |
|------------------------------------------|------------------|-------|-----------------------|-------|---------|
|                                          | First Generation |       | Continuing Generation |       |         |
|                                          | Estimate         | P     | Estimate              | P     |         |
| NE Emotional Similarity→Social Belonging | -0.359           | 0.126 | -0.859                | 0.006 | -1.283  |
| NE Emotional Accuracy→ Social Belonging  | 0.313            | 0.225 | 0.657                 | 0.025 | 0.881   |
| NE Emotional Similarity →Stress          | 0.251            | 0.165 | 0.557                 | 0.005 | 1.145   |
| ND Emotional Accuracy→Stress             | -0.737           | 0.006 | -0.146                | 0.606 | 1.519   |
| Social Belonging→Stress                  | -0.113           | 0.143 | -0.293                | 0.000 | -1.744* |
| ND Emotional Similarity →Stress          | 1.153            | 0.000 | 0.743                 | 0.003 | -1.037  |

Note: NE – Negative Engaged, ND – Negative Disengaged

\*p-value < 0.10. \*\*p-value < 0.05. \*\*\*p-value < 0.01.

The “Group Differences” tool in AMOS (Gaskin, 2016) was used. To test whether our model was invariant across college generational status, the paths of the original model were constrained to be equal across the two groups and the restricted and unrestricted models were compared. The change in fit indices were examined to see whether the added constraints affected fit. Follow-up invariance tests showed that two structural covariances needed to vary freely. Negative Disengaged Emotional Similarity and Negative Disengaged Emotional Accuracy were left to freely vary. This new model presented no structural differences in paths between first- and continuing-generation students, with the exception of Belonging In other words, the overall model structure for the amended model is almost identical for first- and continuing-generation students (See Figures S1 and S2).

**Figure S1**

*Structural Equation Model (SEM) for Testing the Mediation of Belonging on Stress for First-Generation Students*

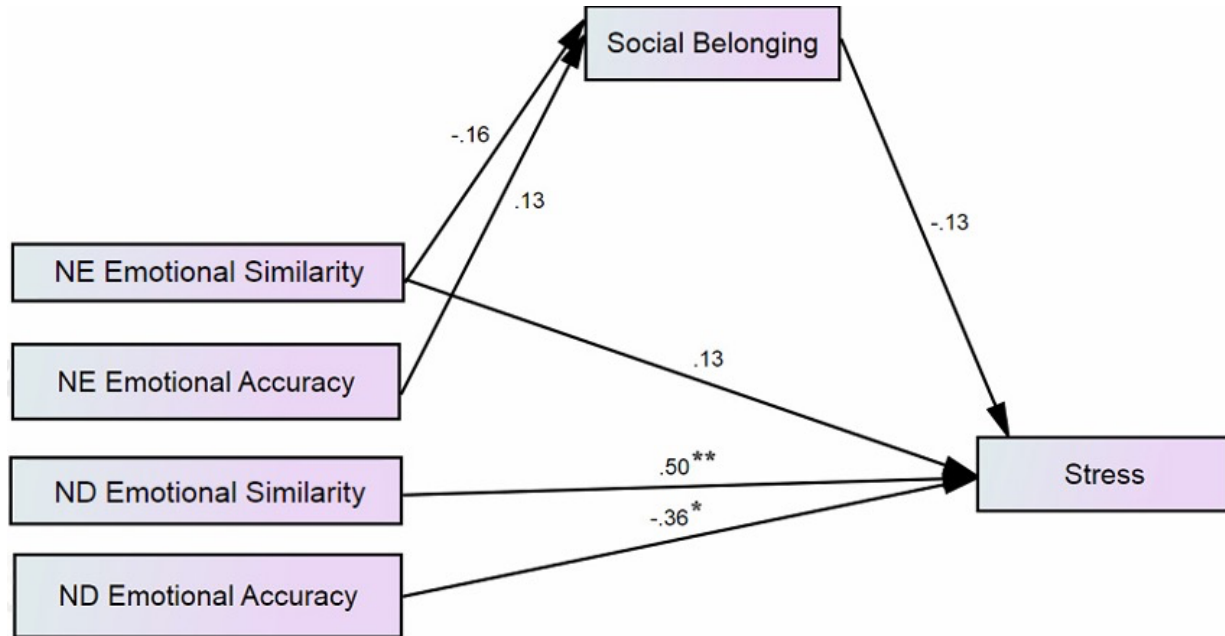

*Note.* \*-  $p < .05$ , \*\*-  $p < .01$ .

**Figure S2**

*Structural Equation Model (SEM) for Testing the Mediation of Belonging on Stress for Continuing-Generation Students*

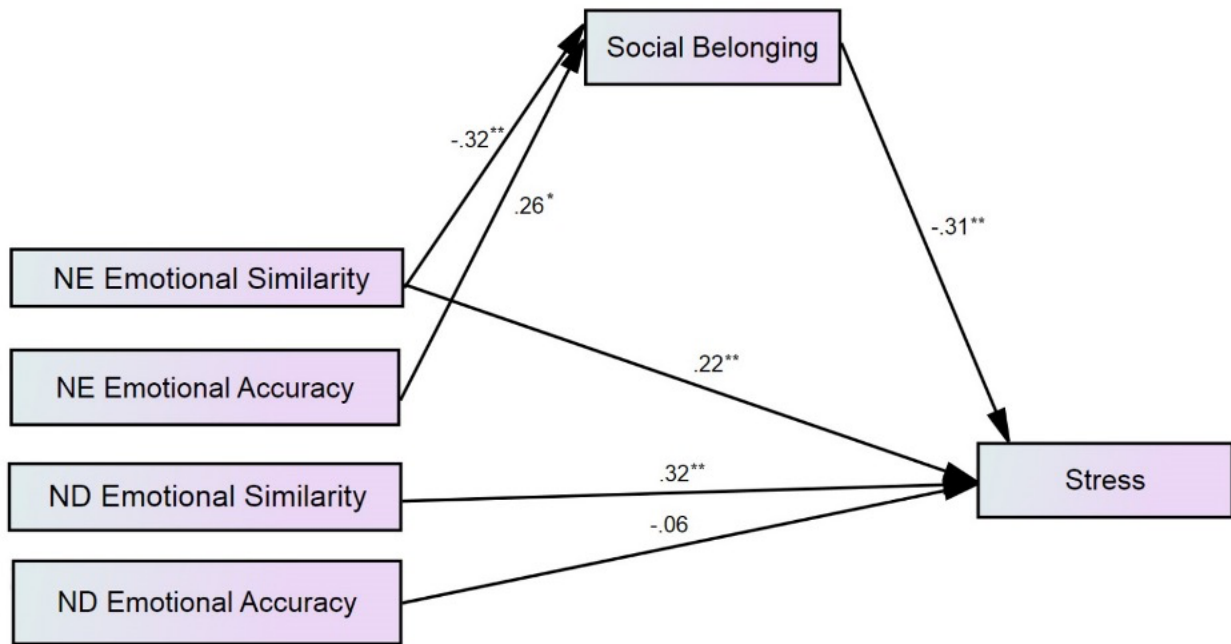

Supplement: Data_Sheet_1.PDF [file Data_Sheet_1.PDF]
